# Supplementary material for: Chitosan-Based Dressing as a Sustained Delivery System for Bioactive Cytokines
Source: MDPI journal article supplement (doi:10.3390/ijms25010030), 2023-12-19
Supplement: s1 [file s1]

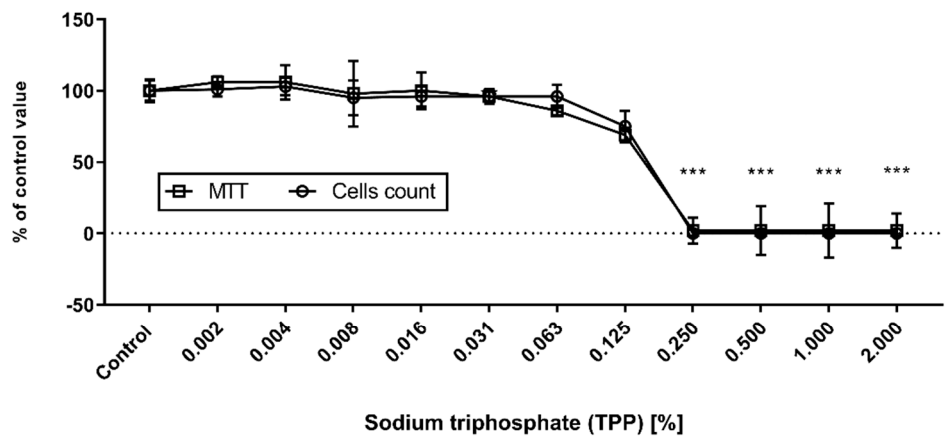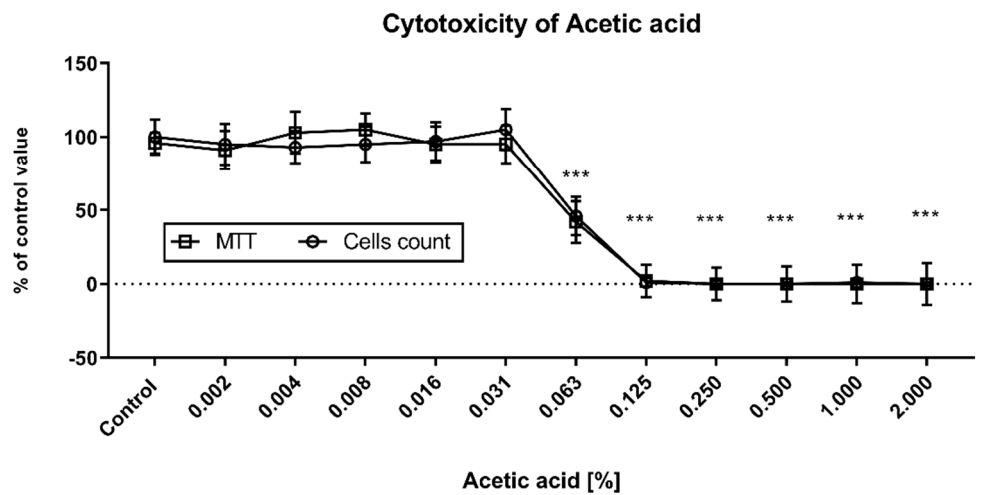

**Figure S1.** Effect of TPP or acetic acid on cytotoxicity on UCSC cells (both compounds were tested as solutions not included in the Ligasano dressing). Results are presented as mean  $\pm$  standard deviation and are expressed as a percentage relative to a control consisting of UCSC cells in culture medium without any additional agents.  $n = 10$  ( $n$ ) - number of samples/group. \*\*\* -  $p < 0.001$  (compared to control values). Statistical evaluations were performed between the experimental and control group. Statistical analysis in all groups was performed by one-way ANOVA with Bonferroni correction.

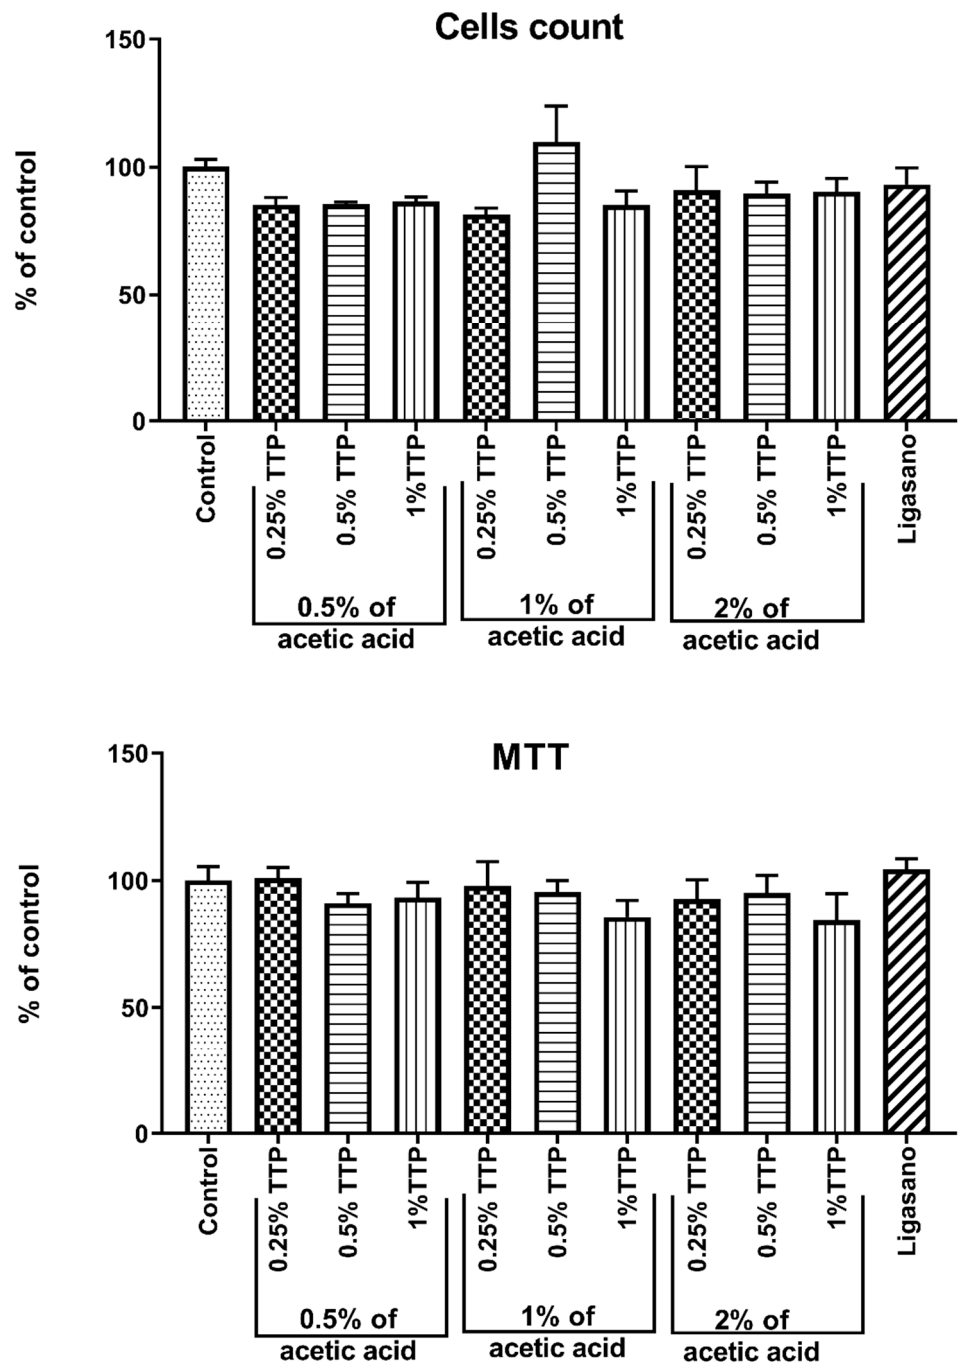

**Figure S2.** The impact of varying concentrations of TPP and acetic acid employed in dressing preparation and storage techniques on the dressing cytotoxicity on UCSC cells. Results are presented as mean  $\pm$  standard deviation and are expressed as a percentage relative to a control consisting of UCSC cells in culture medium without any additional agents.  $n = 10$  ( $n$ ) - number of samples/group. There were no statistical differences between samples. Statistical evaluations were performed between the experimental and control groups. Statistical analysis in all groups was performed by one-way ANOVA with Bonferroni correction.

**A**

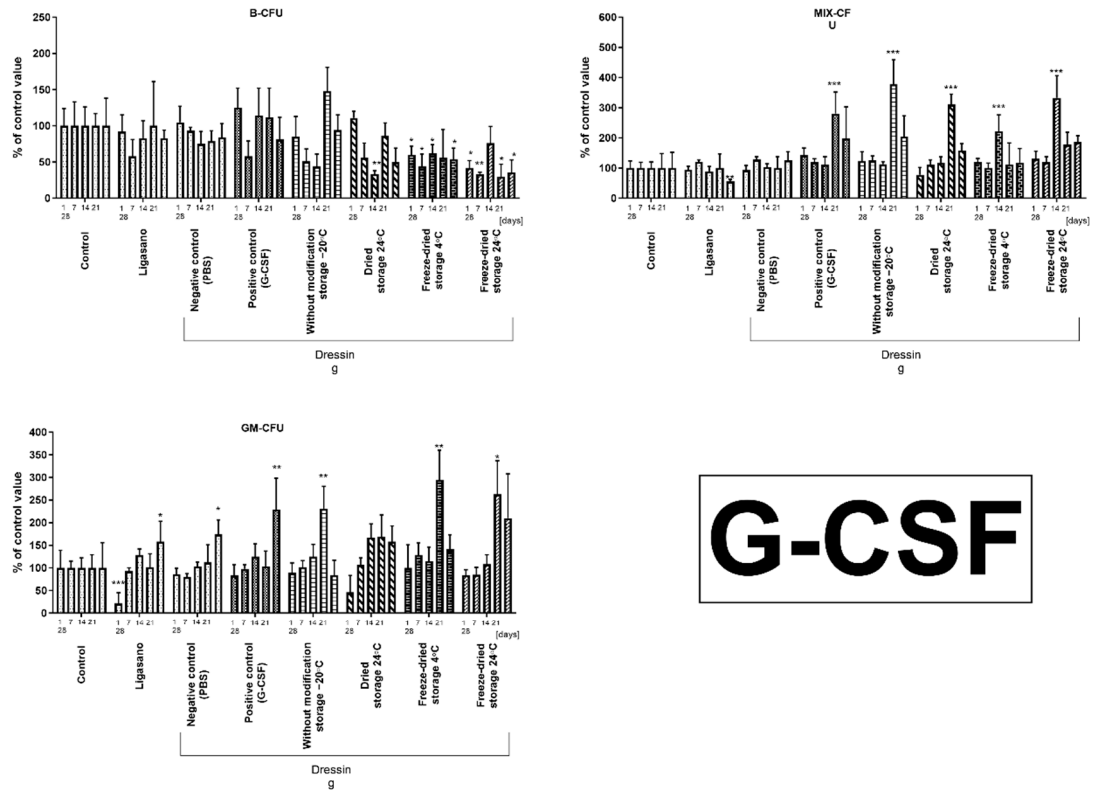

**B**

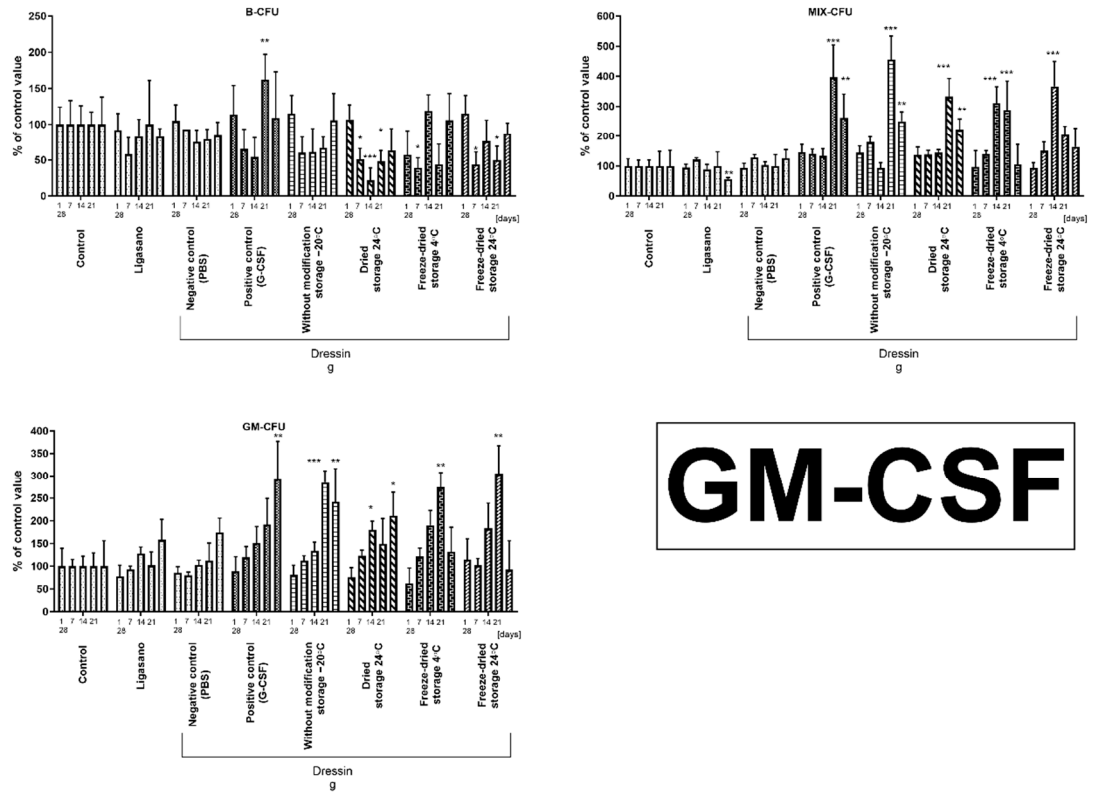

**Figure S3 A-B.** Evaluation of cytokines activity measured in culture of cord blood hematopoietic stem cells in MethoCult™ H4330 methylcellulose medium with

EPO. A - G-CSF; B - GM-CSF. Cytokines were incorporated into dressings which were prepared using different techniques and were stored 1, 7, 14, 21, and 28 days. Results are presented as mean  $\pm$  standard deviation. n = 9 (n) - number of samples/group. \* -  $p < 0.05$ ; \*\* -  $p < 0.01$ ; \*\*\* -  $p < 0.001$  comparisons was made between an appropriate day in experimental and control group values. Statistical analysis in all groups were performed by non-parametric Kruskal-Wallis with Dunn's multiple comparison test.
